# Supplementary material for: GPs’ perspectives on the management of patients with multimorbidity: systematic review and synthesis of qualitative research
Source: HighWire-hosted journal article supplement (doi:10.1136/bmjopen-2013-003610), 2013-09-01
Supplement: bmjopen-2013-003610supp_appendix2.pdf [file bmjopen-2013-003610supp_appendix2.pdf]

## Appendix 2. Excluded studies

When screening titles by title/abstract, I first looked at whether it was clearly not qualitative research (a randomised control trial or guidelines). If this was unclear from the title, then I considered if it was clearly not dealing with multimorbidity (ie title contained other disease focus such as prostatic disease or asthma). If the citation was still not excludable, I then considered if I was primary care based or concerned the GPs perspective. For foreign language titles, Google translate was used to ascertain if the title was applicable.

### EMBASE

Of the 1105 that remained after excluding duplicates, 1082 were excluded by reading titles / abstracts, leaving 23 citations.

- Excluded because not primary care based : 34 (pharmacy/hospital/dentistry)
- Excluded because not qualitative: 577 (guidelines/editorials/ reviews/ quan research/ opinions/recommendations/education related)
- Excluded because not concerning MM: 447 (asthma/COPD/ psychiatric disease/ abs/gout/cv disease)
- Excluded because no related to Dr or decision making: 24

Of the 23 remaining, the following 18 were excluded after reading the full texts:

1. Ampt AJ, Amoroso C, Harris MF, McKenzie SH, Rose VK, Taggart JR. Attitudes, norms and controls influencing lifestyle risk factor management in general practice. [Internet]. BMC family practice. 2009. Concerns lifestyle modification in the management of chronic disease, but does not incorporate multimorbidity.
2. Balla, 2012 #5087; Balla J, Heneghan C, Thompson M, Balla M. Clinical decision making in a high-risk primary care environment: A qualitative study in the UK. BMJ Open [Internet]. 2012;2(1). Concerns decision making and out of hours care.
3. Boyd, 2005 #5697; Boyd CM, Darer J, Boulton C, Fried LP, Boulton L, Wu AW. Clinical practice guidelines and quality of care for older patients with multiple comorbid diseases: implications for pay for performance. JAMA. 2005 Aug 10;294(6):716-24. Review of one case vignette/policy analysis.
4. Davidson, 1995 #6059; Davidson, W, Molloy, W, Bedard, M. Physician characteristics and prescribing for elderly people in New Brunswick: Relation to patient outcomes Canadian Medical Association Journal. 1995. 152. 8. Quantitative analysis only.
5. Demirkol, 2003 #5826; Demirkol A, Ritchie JE, Craig P. Providing healthcare for people with chronic illness: the views of Australian GPs. Med J Aust. 2003 Sep 1;179(5):269. Not concerning multimorbidity.
6. Fortin, 2007 #5577; Editorial
7. Horne, 2001 #5943; Horne R, Mailey E, Frost S, Lea R. Shared care: a qualitative study of GPs' and hospital doctors' views on prescribing specialist medicines. Br J Gen Pract. 2001

Challenges in the management of multimorbidity: A meta-ethnography of the GPs perspective

Mar;51(464):187-93. Concerns GPs perceptions of shared care between primary and secondary care.

8. Hudon, 2012 #5041; Hudon C, Fortin M, Haggerty J, Loignon C, Lambert M, Poitras ME. Patient-centered care in chronic disease management: A thematic analysis of the literature in family medicine. *Patient Educ Couns*. 2012 Aug;88(2):170-6. Epub 2012 Feb 22. Analysis of existing literature rather than primary data.
9. Kadam, 2012 #5012; Editorial
10. Loeb, 2011 #5197; Loeb DF, Bayliss EA, Binswanger IA, Candrian C, Degruy FV. Primary care physician perceptions on caring for complex patients with medical and mental illness. *J Gen Intern Med*. 2012 Aug;27(8):945-52. Epub 2012 Feb 28. Topic guide focused interviews on the interaction between mental and physical illness, making mental illness an index illness.
11. Mangin, 2012 #5048; Editorial.
12. Martin, 2002 #5918; Martin C, Rohan BG. Chronic illness care as a balancing act. A qualitative study. [Internet]. *Australian family physician*. 2002. Concerns models of care rather than delivery of care/actual patient management.
13. May, 2004 #5795; May C, Allison G, Chapple A, Chew-Graham C, Dixon C, Gask L, Graham R, Rogers A, Roland M. Framing the doctor-patient relationship in chronic illness: a comparative study of general practitioners' accounts. *Sociol Health Illn*. 2004 Mar;26(2):135-58. Re-analysis of previously gathered qualitative data to examine the doctor –patient relationship.
14. Salisbury, 2012 #5057; Editorials
15. Saltman, 2004 #5794; Editorials
16. Shepherd, 2012 #5036; Letter in response to Mercer article.
17. Webster, 2000 #5951 Letter.
18. Weiner M, Wells S, Kerse N. Perspectives of general practitioners towards evaluation and treatment of cardiovascular diseases among older people. *J Prim Health Care*. 2009 Sep;1(3):198-206. Although reported as mixed methods, the qualitative component was just 'narrative comments' at the end of a quantitative/likert questionnaire.
19. Abstract only: Limm, 2012 #5088; Study authors contacted – Dr C Boyd – and full account not yet published.

4 were included after reading fulltexts

- 1) Bower, 2011 #5145;
- 2) Smith, 2010 #5300;
- 3) O'Brien, 2011 #5227;
- 4) Marx, 2009 #5434.

Challenges in the management of multimorbidity: A meta-ethnography of the GPs perspective

## CINAHL.

59 citations reviewed after duplicates removed. 55 excluded by reading the titles/abstracts, leaving 4 full papers to be reviewed.

- 14 excluded as not qualitative papers
- 32 excluded as not concerning multimorbidity (COPD + mental health issues predominantly)
- 9 excluded as did not concern the GPs perspective/ decision making. (patient perspective).

Four full papers reviewed – 3 excluded, one included.

- 1) Falling on stony ground? A qualitative study of implementation of clinical guidelines' prescribing recommendations in primary care.(includes abstract); Rashidian A; Eccles MP; Russell I; Health Policy, 2008 Feb; 85 (2): 148-61. GP assessment of the process in development and use of CPGs
- 2) Interactions between practitioners and patients with chronic illnesses.(includes abstract); Kupka NJ; Rush University, College of Nursing, 2003; D.N.Sc. (108 p) (doctoral dissertation – research) Are motivational techniques used by GPs in managing CD?
- 3) Mutual influence in shared decision making: a collaborative study of patients and physicians. By: Lown, Beth A.; Hanson, Janice L.; Clark, William D. Health Expectations. Jun2009, Vol. 12 Issue 2, p160-174. 15p. Concerns characteristics of the DrPt relationship and SDM.
- 4) Fried: included.

## Medline

364 citations read : 360 excluded by title abstract:

- Excluded because not primary care based : 12 (pharmacy/hospital/dentistry)
- Excluded because not qualitative: 185 (guidelines/editorials/ reviews/ quan research/ opinions/recommendations/education related)
- Excluded because not concerning MM: 153 (asthma/COPD/ psychiatric disease/ abs/gout/cv disease)
- Excluded because no related to Dr or decision making: 10

Full texts retrieved for 4 citations. The following were excluded:

- 1) Müller-Engelmann M, Keller H, Donner-Banzhoff N, Krones T. Shared decision making in medicine: the influence of situational treatment factors. Patient Educ Couns. 2011 Feb;82(2):240-6. Concerns what situations shared decision making is an appropriate approach.
- 2) (Harries, Forrest et al. 2007) Really focuses on management of angina and has only one line on MM in qual section.
- 3) Solomon: included.

Challenges in the management of multimorbidity: A meta-ethnography of the GPs perspective

4) Luijks: included.

### **PsycInfo**

137 citations read. 134 excluded by title abstract, leaving three full texts for review.

- Excluded because not primary care based : 0 (pharmacy/hospital/dentistry)
- Excluded because not qualitative: 48 (guidelines/editorials/ reviews/ quan research/ opinions/recommendations/education related)
- Excluded because not concerning MM: 72 (asthma/COPD/ psychiatric disease/ abs/gout/cv disease)
- Excluded because no related to Dr or decision making: 14

Full texts retrieved for 3 citations. The following were excluded:

- 1) Physicians' view of primary care-based case management for patients with heart failure: A qualitative study. Peters-Klimm, Frank Olbort, Rebecca Campbell, Stephen Mahler, Cornelia Miksch, Antje Baldauf, Annika Szecsenyi, Joachim ; International Journal for Quality in Health Care, Vol 21(5), Oct, 2009. pp. 363-371. Concerns the evaluation of the implementation of a case management programme for heart failure.
- 2) (Chew-Graham and Hogg 2002). Concerns the management and diagnosis of depression in patients with chronic physical disease
- 3) Steinman was included.

### **Academic Search Complete / Social Science Full Text/**

140 citations read. 137 excluded by title abstract:

- Excluded because not primary care based : 2 (pharmacy/hospital/dentistry)
- Excluded because not qualitative: 67 (guidelines/editorials/ reviews/ quan research/ opinions/recommendations/education related)
- Excluded because not concerning MM: 65 (asthma/COPD/ psychiatric disease/ abs/gout/cv disease)
- Excluded because no related to Dr or decision making: 3

Full texts retrieved for 3 citations. One was excluded

- 1) GPs' decision-making--perceiving the patient as a person or a disease. By: André, Malin; Andén, Annika; Borgquist, Lars; Edvard Rudebeck, Carl. BMC Family Practice. 2012, Vol. 13 Issue 1, p38-43. 6p. Concerns things that influence gradual or immediate decision making in primary care, and used a quantitative questionnaire.
- 2) Hunt excluded as although does deal with multiple chronic diseases, (DM and HTN) does not deal with the presentation of these in tandem as multimorbidity.
- 3) Schuling included

Challenges in the management of multimorbidity: A meta-ethnography of the GPs perspective

|                          | Citations   | Duplicates within this database and in comparison to other databases* | After removal of duplicates | Excluded by title/abstract | Not Primary Care | Not Qualitative Research | Not Multimorbidity | Not Dr's perspective | Full text read | Not Primary Care | Not Qualitative Research | Not Multimorbidity | Not Dr's perspective | Included | Full text not available | Excluded by Full text |  |
|--------------------------|-------------|-----------------------------------------------------------------------|-----------------------------|----------------------------|------------------|--------------------------|--------------------|----------------------|----------------|------------------|--------------------------|--------------------|----------------------|----------|-------------------------|-----------------------|--|
| EMBASE                   | 1121        | 16                                                                    | 1105                        | 1082                       | 34               | 577                      | 447                | 24                   | 23             | 0                | 11                       | 7                  | 0                    | 4        | 1                       | 19                    |  |
| CINAHL                   | 65          | 6                                                                     | 59                          | 55                         | 0                | 14                       | 32                 | 9                    | 4              | 0                | 0                        | 3                  | 0                    | 1        | 0                       | 3                     |  |
| PsycInfo                 | 184         | 47                                                                    | 137                         | 134                        | 0                | 48                       | 72                 | 14                   | 3              | 0                | 0                        | 2                  | 0                    | 1        | 0                       | 2                     |  |
| Academic Search Complete | 198         | 58                                                                    | 140                         | 137                        | 2                | 67                       | 65                 | 3                    | 3              | 0                | 0                        | 2                  | 0                    | 1        | 0                       | 2                     |  |
| Medline (Ovid)           | 437         | 73                                                                    | 364                         | 360                        | 12               | 185                      | 153                | 10                   | 4              | 0                | 0                        | 2                  | 0                    | 2        | 0                       | 2                     |  |
| <b>Total</b>             | <b>2005</b> | <b>200</b>                                                            | <b>1805</b>                 | <b>1768</b>                | <b>48</b>        | <b>891</b>               | <b>769</b>         | <b>60</b>            | <b>37</b>      | <b>0</b>         | <b>11</b>                | <b>16</b>          | <b>0</b>             | <b>9</b> | <b>1</b>                | <b>28</b>             |  |

Table showing distribution of excluded articles across databases.

\*Duplicates searched for in order of EMBASE/ CINAHL/Medline/PsycInfo/ASS)
