# Supplementary material for: GPs’ perspectives on the management of patients with multimorbidity: systematic review and synthesis of qualitative research
Source: HighWire-hosted journal article supplement (doi:10.1136/bmjopen-2013-003610), 2013-09-01
Supplement: bmjopen-2013-003610supp_appendix3.pdf [file bmjopen-2013-003610supp_appendix3.pdf]

Appendix 3. Data Extraction Template<sup>1</sup>

|                                                  |  |
|--------------------------------------------------|--|
| Author                                           |  |
| Background of authors                            |  |
| Country of study                                 |  |
| Year of publication                              |  |
| Setting of study                                 |  |
| Aims (Phenomena of Interest)                     |  |
| Participants<br>GPs (n)<br>Others(profession, n) |  |
| Professional Orientation/Focus of GPs            |  |
| Methodology                                      |  |
| Methods<br>Data collection<br>Data analysis      |  |
| Main findings                                    |  |

---

<sup>1</sup> [www.joannabriggs.edu.au/documents/jbireviewmanual\\_cip11449.pdf](http://www.joannabriggs.edu.au/documents/jbireviewmanual_cip11449.pdf)
