# Supplementary material for: GPs’ perspectives on the management of patients with multimorbidity: systematic review and synthesis of qualitative research
Source: HighWire-hosted journal article supplement (doi:10.1136/bmjopen-2013-003610), 2013-09-01
Supplement: bmjopen-2013-003610supp_appendix4.pdf [file bmjopen-2013-003610supp_appendix4.pdf]

## Enhancing transparency in reporting the synthesis of qualitative research: the ENTREQ statement

| No | Item                       | Guide and description                                                                                                                                                                                                                                                                                                                                                                           |
|----|----------------------------|-------------------------------------------------------------------------------------------------------------------------------------------------------------------------------------------------------------------------------------------------------------------------------------------------------------------------------------------------------------------------------------------------|
| 1  | Aim                        | To synthesize the existing published literature on the perceptions of GPs or their equivalent on the clinical management of multimorbidity and determine targets for future research that aims to improve clinical care in multimorbidity                                                                                                                                                       |
| 2  | Synthesis methodology      | Meta-ethnography                                                                                                                                                                                                                                                                                                                                                                                |
| 3  | Approach to searching      | Pre-planned comprehensive search strategies used to seek all available studies                                                                                                                                                                                                                                                                                                                  |
| 4  | Inclusion criteria         | Qualitative research methods (data collection and analysis)<br>Population: General Practitioners or their equivalent<br>Topic: Clinical management of multimorbidity<br>No language or year limits                                                                                                                                                                                              |
| 5  | Data sources               | Electronic databases (MEDLINE, EMBASE, CINAHL, psycINFO, Econlit), Grey literature databases included WORLDCAT via the Online Computer Library Center (OCLC), Proquest, PapersFirst via OCLC, ASSIA (Applied Social Sciences Index and Abstracts), Directory of Open Access Books (DOAB) and Ebrary.<br>Search was last updated on 21 <sup>st</sup> September 2012                              |
| 6  | Electronic Search strategy | Literature search terms are described in detail in Appendix 1                                                                                                                                                                                                                                                                                                                                   |
| 7  | Study screening methods    | The titles and abstracts of retrieved citations were scanned by one reviewer (CS).<br>Full papers were ordered for all potentially relevant abstracts<br>Full papers were reviewed by two researchers (CS, CB) and were included if they met our inclusion criteria                                                                                                                             |
| 8  | Study characteristics      | The characteristics of the included studies <i>are presented in Table 1.</i>                                                                                                                                                                                                                                                                                                                    |
| 9  | Study selection results    | The studies screened are described in brief in Figure 1 (Flow diagram) and in greater detail in Appendix 2 (Excluded studies)                                                                                                                                                                                                                                                                   |
| 10 | Rationale for appraisal    | One study formally assessed quality.<br>Decisions on inclusion and relevance of studies to our research question was independently conducted by two reviewers (CS, CB)                                                                                                                                                                                                                          |
| 11 | Appraisal items            | The CASP tool was used to appraise all included studies                                                                                                                                                                                                                                                                                                                                         |
| 12 | Appraisal process          | Quality assessment was formerly conducted by one reviewer (CS)                                                                                                                                                                                                                                                                                                                                  |
| 13 | Appraisal results          | Study quality assessments are available for review if required..                                                                                                                                                                                                                                                                                                                                |
| 14 | Data extraction            | <i>A data extraction proforma was derived from the Johanna Briggs data extraction tool. All text under the headings "results /conclusions" was considered data from the primary studies unless it was stated to be given by a healthcare professional that was not a GP. This data was extracted electronically and entered into a computer software package to facilitate data management.</i> |
| 15 | Software                   | NVivo 9                                                                                                                                                                                                                                                                                                                                                                                         |
| 16 | Number of reviewers        | Three reviewers – CS, SMH, CB.                                                                                                                                                                                                                                                                                                                                                                  |

### Enhancing transparency in reporting the synthesis of qualitative research: the ENTREQ statement

| No | Item                 | Guide and description                                                                                                                                                                                                                                                                                                       |
|----|----------------------|-----------------------------------------------------------------------------------------------------------------------------------------------------------------------------------------------------------------------------------------------------------------------------------------------------------------------------|
| 17 | Coding               | The meta-ethnographic approach described by Noblit & Hare.                                                                                                                                                                                                                                                                  |
| 18 | Study comparison     | Overarching concepts that represented the entire dataset were formulated after initial readings of the included papers. The specific contribution of each paper to each key concept was then determined.                                                                                                                    |
| 19 | Derivation of themes | Themes were derived initially as key concepts representing the entire dataset. The contribution of each paper to each key concept was determined and the meaning of the key concept modified accordingly.                                                                                                                   |
| 20 | Quotations           | Quotations from the primary studies are provided in Table 2 to illustrate themes/constructs.                                                                                                                                                                                                                                |
| 21 | Synthesis output     | A line of argument was derived which represents a statement of GPs' perception of multimorbidity. The key concepts demonstrate key areas that have arisen from existing qualitative work, in a variety of healthcare settings, and as such gives direction to on-going research and intervention development in this field. |
