# Supplementary material for: GPs’ perspectives on the management of patients with multimorbidity: systematic review and synthesis of qualitative research
Source: HighWire-hosted journal article supplement (doi:10.1136/bmjopen-2013-003610), 2013-09-01
Supplement: bmjopen-2013-003610supp_appendix5.pdf [file bmjopen-2013-003610supp_appendix5.pdf]

Appendix 5. Table of subthemes within key concepts.

| Key Concept (number of papers)                                | Sub-themes (number of papers)                                                                                                                                                                                                                                                                                                           |
|---------------------------------------------------------------|-----------------------------------------------------------------------------------------------------------------------------------------------------------------------------------------------------------------------------------------------------------------------------------------------------------------------------------------|
| Disorganisation and fragmentation of healthcare (8)           | Structure of primary health care (6)<br>Inadequate time (5)<br>Fragmented care/ involvement of secondary care (8)                                                                                                                                                                                                                       |
| The inadequacy of guidelines and evidence based medicine (10) | Single disease focus (5)<br>Doubts on the evidence underpinning guidelines (5)<br>Guidelines add to complexity (7)<br>Queries on the relevance of disease specific outcomes (6)<br>The use of guidelines for primary prevention (5)<br>Using modified approaches to guidelines (5)<br>Linking guidelines to physician reimbursement (3) |
| Challenges in delivering patient-centred care (10)            | Individualising management (7)<br>Taking a generalist approach (10)<br>Importance of a longitudinal patient-GP relationship (7)<br>The impact of multimorbidity and treatment burden (9)<br>Specific complicating patient characteristics (6)                                                                                           |
| Challenges in shared decision making (10)                     | Discussing risks and outcomes associated with treatment options (8)<br>Using alternative models of decision making (7)<br>Lack of appropriate communication skills (3)<br>Approaches to changing or de-prescribing medications (6)                                                                                                      |

Number of papers related to this key concept / subtheme in brackets.
